# Supplementary material for: Maximum Gross Primary Productivity Dominates the Trend in Gross Primary Productivity in China’s Deciduous Forest Ecosystems
Source: MDPI journal article supplement (doi:10.3390/f14091880), 2023-09-15
Supplement: s1 [file s1]

Archive with 1 entries (1 files):
- forests-2559957-supplementary.pdf
